# Supplementary material for: Icaritin, an inhibitor of beta-site amyloid cleaving enzyme-1, inhibits secretion of amyloid precursor protein in APP-PS1-HEK293 cells by impeding the amyloidogenic pathway
Source: PeerJ. 2019 Dec 10;7:e8219. doi: 10.7717/peerj.8219 (PMC6910110; doi:10.7717/peerj.8219)
Supplement: Supplemental Information 2 [file peerj-07-8219-s002.xlsx]

## Sheet: Sheet1
	Fig.2 IC50 of ICT for BACE1. The BACE1 inhibition assay was executed using a BACE1 FRET kit.
	1h
		Negative control	Blank control	0.01μM	0.1μM	0.5μM	1μM	5μM	10μM	15μM	20μM	30μM	40μM	50μM	75μM	100μM	200μM		0.01	-0.00589094	0.0150362		log(inhibitor) vs. normalized response -- Variable slope
	RFU-1	3627.1	102.4	3516.2	3482.6	3496.5	3062.7	2063.4	1327.4	655.3	681.2	659.4	603.5	602.5	568.3	602.5	533.4		0.1	-0.013378	0.0275913		Best-fit values
	RFU-2	3423.4	93.4	3558.7	3661.9	3445.7	3223.4	2118.5	1223.6	647.5	603.8	603.8	583.4	638.7	562.7	651.2	624.5		0.5	0.0221322	0.00751695		LogIC50	0.7556
	RFU-3	3582.8	99.6	3619.3	3627.1	3462.3	3481.2	1918.2	1026.5	567.3	652.3	612.7	526.7	566.8	582.6	603.5	583.1		1	0.0837694	0.0612656		HillSlope	1.091
	average	3544.43	98.4667																5	0.438503	0.0300271		IC50	5.696
				3417.73	3384.13	3398.03	2964.23	1964.93	1228.93	556.833	582.733	560.933	505.033	504.033	469.833	504.033	434.933		10	0.682518	0.0443538		Std. Error
				3460.23	3563.43	3347.23	3124.93	2020.03	1125.13	549.033	505.333	505.333	484.933	540.233	464.233	552.733	526.033		15	0.847677	0.0141358		LogIC50	0.06574
				3520.83	3528.63	3363.83	3382.73	1819.73	928.033	468.833	553.833	514.233	428.233	468.333	484.133	505.033	484.633		20	0.841177	0.0113499		HillSlope	0.1445
	average			3466.27															30	0.847116	0.00866661		95% Confidence Intervals
				0.985998	0.976305	0.980315	0.855166	0.566873	0.354541	0.160644	0.168116	0.161826	0.1457	0.145411	0.135544	0.145411	0.125476		40	0.862815	0.0115576		LogIC50	0.6123 to 0.8988
				0.998259	1.02803	0.965659	0.901527	0.582769	0.324595	0.158393	0.145786	0.145786	0.139901	0.155855	0.133929	0.159461	0.151758		50	0.853684	0.0104326		HillSlope	0.7758 to 1.406
				1.01574	1.01799	0.970449	0.975901	0.524984	0.267733	0.135256	0.159778	0.148354	0.123543	0.135112	0.13967	0.1457	0.139814		75	0.862815	0.00297799		IC50	4.095 to 7.922
	average			1	1.00744	0.972141	0.910865	0.558209	0.315623	0.151431	0.157893	0.151989	0.136381	0.145459	0.136381	0.15019	0.139016		100	0.848925	0.00807691		Goodness of Fit
	SD			0.0149481	0.0274297	0.00747293	0.0609068	0.0298512	0.0440941	0.014053	0.0112834	0.00861586	0.0114899	0.0103715	0.00296055	0.00802961	0.0131591		200	0.860165	0.0132366		Degrees of Freedom	12
																							R2	0.9696
																							Absolute Sum of Squares	571.4
																							Sy.x	6.9
																							Number of points
		Negative control	control	0.01μM	0.1μM	0.5μM	1μM	5μM	10μM	15μM	20μM	30μM	40μM	50μM	75μM	100μM	200μM						Analyzed	14
	RFU-1	3627.1	102.4	3516.2	3482.6	3496.5	3062.7	2063.4	1327.4	655.3	681.2	659.4	603.5	602.5	568.3	602.5	533.4
	RFU-2	3423.4	93.4	3558.7	3661.9	3445.7	3223.4	2118.5	1223.6	647.5	603.8	603.8	583.4	638.7	562.7	651.2	624.5
	RFU-3	3582.8	99.6	3619.3	3627.1	3462.3	3481.2	1918.2	1026.5	567.3	652.3	612.7	526.7	566.8	582.6	603.5	583.1
	average	3544.43	98.4667
	inhibition-1			0.00819315	0.0179437	0.01391	0.139796	0.429787	0.643371	0.83841	0.830894	0.83722	0.853442	0.853732	0.863657	0.853732	0.873785
	inhibition-2			-0.00414011	-0.0340882	0.0286519	0.0931621	0.413798	0.673493	0.840674	0.853355	0.853355	0.859275	0.843227	0.865282	0.8396	0.847348
	inhibition-3			-0.0217259	-0.0239894	0.0238346	0.01835	0.471924	0.73069	0.863947	0.839281	0.850772	0.875729	0.864092	0.859507	0.853442	0.859362
	average			-0.00589094	-0.013378	0.0221322	0.0837694	0.438503	0.682518	0.847677	0.841177	0.847116	0.862815	0.853684	0.862815	0.848925	0.860165
	SD			0.0150362	0.0275913	0.00751695	0.0612656	0.0300271	0.0443538	0.0141358	0.0113499	0.00866661	0.0115576	0.0104326	0.00297799	0.00807691	0.0132366
	Fig. 3 MTT and LDH assays in APP-PS1-293 cells.
	24h
		control	Sample control	Lysis cell sample control	0.01μM	0.1μM	0.5μM	1μM	5μM	10μM	15μM	20μM	30μM	40μM	50μM	75μM	100μM	200μM
	LDH-1	0.046	0.482	1.826	0.562	0.558	0.537	0.567	0.369	0.468	0.584	0.578	0.603	0.612	0.715	0.652	0.621	0.659
	LDH-2	0.03	0.439	1.903	0.531	0.567	0.572	0.552	0.344	0.451	0.566	0.533	0.634	0.633	0.664	0.761	0.649	0.671
	LDH-3	0.058	0.418	1.882	0.588	0.581	0.566	0.544	0.378	0.462	0.592	0.571	0.627	0.671	0.639	0.649	0.677	0.703
	LDH-4	0.061	0.422	1.829	0.537	0.537	0.547	0.537	0.389	0.455	0.603	0.569	0.583	0.568	0.651	0.681	0.681	0.685
	LDH-5	0.058	0.438	1.937	0.567	0.564	0.536	0.586	0.362	0.482	0.578	0.588	0.617	0.637	0.674	0.693	0.635	0.661
	LDH-6	0.047	0.467	1.967	0.517	0.583	0.571	0.563	0.348	0.433	0.591	0.567	0.633	0.637	0.659	0.657	0.614	0.682
	average	0.05	0.444333	1.89067	0.560333	0.565	0.558333	0.558167	0.363667	0.4585	0.585667	0.560667	0.616167	0.638667	0.667	0.682167	0.649	0.676833
	SD	0.0116103	0.0252719	0.0568952	0.0285365	0.0168404	0.0187172	0.0176796	0.0176163	0.0165741	0.0127854	0.0242143	0.0199641	0.0299054	0.0263287	0.0423718	0.028	0.0166183
	24h
		control	Negative control	0.01μM	0.1μM	0.5μM	1μM	5μM	10μM	15μM	20μM	30μM	40μM	50μM	75μM	100μM	200μM
	MTT-1	0.061	1.027	0.982	0.925	0.934	0.983	1.284	1.102	0.855	0.567	0.517	0.524	0.522	0.506	0.501	0.468
	MTT-2	0.058	0.968	0.967	0.983	0.992	1.028	1.005	1.067	0.817	0.624	0.566	0.5	0.541	0.534	0.532	0.512
	MTT-3	0.059	0.992	1.085	1.036	0.904	0.983	1.148	1.008	0.864	0.581	0.549	0.51	0.529	0.486	0.507	0.527
	MTT-4	0.049	1.037	1.021	1.048	0.935	0.981	1.293	1.067	0.826	0.593	0.538	0.531	0.518	0.492	0.513	0.482
	MTT-5	0.052	1.008	1.067	0.958	1.008	1.067	1.305	1.004	0.824	0.561	0.522	0.518	0.511	0.512	0.492	0.459
	MTT-6	0.053	0.975	1.134	1.028	1.056	1.111	1.428	0.983	0.819	0.548	0.548	0.516	0.506	0.507	0.486	0.473
	average	0.0553333	1.00117	1.04267	0.996333	0.9715	1.0255	1.24383	1.0385	0.834167	0.579	0.54	0.5165	0.521167	0.506167	0.505167	0.486833
	SD	0.00467618	0.0278095	0.0641893	0.0489517	0.056899	0.0540953	0.146911	0.0465994	0.0200939	0.0270333	0.0183194	0.0108028	0.0126399	0.0168335	0.016388	0.0267986
	Fig. 4 Effects of ICT on the mRNA and protein expression of APP in the APP-PS1-HEK293 cells.
	Sample Name	Target Name	Cт	ΔCт	ΔCт Mean	ΔCт SD
	ctrl	GAPDH	18.7954
	ctrl	GAPDH	18.7066
	ctrl	GAPDH	18.8676
	ICT low	GAPDH	19.3858
	ICT low	GAPDH	19.3525
	ICT low	GAPDH	19.6012
	ICT mid	GAPDH	17.225
	ICT mid	GAPDH	17.4598
	ICT mid	GAPDH	17.6104
	ICT high	GAPDH	17.2669
	ICT high	GAPDH	17.6277
	ICT high	GAPDH	17.6612
	ctrl	BACE1	27.2639	8.46856	8.57709	0.0941911
	ctrl	BACE1	27.3442	8.63758
	ctrl	BACE1	27.4928	8.62512
	ICT low	BACE1	28.01	8.6242	8.75019	0.133054
	ICT low	BACE1	28.0896	8.73704
	ICT low	BACE1	28.4905	8.88933
	ICT mid	BACE1	26.4056	9.18059	9.08184	0.0879022			ΔCт	ΔΔCт	value	SD
	ICT mid	BACE1	26.5125	9.05278				ctrl	8.57709	-1909.62	#NUM!	0.0941911
	ICT mid	BACE1	26.6226	9.01214				ICT low	8.75019	-1909.45	#NUM!	0.133054
	ICT high	BACE1	26.7538	9.48694	9.5969	0.149393		ICT mid	9.08184	-1909.12	#NUM!	0.0879022
	ICT high	BACE1	27.1645	9.53678				ICT high	9.5969	-1908.6	#NUM!	0.149393
	ICT high	BACE1	27.4281	9.76699
	ctrl	PS1	26.6531	7.85773	7.99588	0.120805
	ctrl	PS1	26.7549	8.04826
	ctrl	PS1	26.9493	8.08166
	ICT low	PS1	27.2343	7.84848	7.93659	0.0887156
	ICT low	PS1	27.3784	8.0259
	ICT low	PS1	27.5366	7.93541
	ICT mid	PS1	25.4739	8.24884	8.27559	0.0451966			ΔCт	ΔΔCт	value	SD
	ICT mid	PS1	25.7875	8.32778				ctrl	7.99588	7.99588	0.00391742	0.120805
	ICT mid	PS1	25.8606	8.25017				ICT low	7.93659	7.93659	0.00408176	0.0887156
	ICT high	PS1	25.976	8.70909	8.72228	0.108654		ICT mid	8.27559	8.27559	0.00322699	0.0451966
	ICT high	PS1	26.2485	8.62082				ICT high	8.72228	8.72228	0.00236773	0.108654
	ICT high	PS1	26.4981	8.83693
	ctrl	a-secretase	25.629	6.83363	6.96492	0.117082
	ctrl	a-secretase	25.7093	7.00261
	ctrl	a-secretase	25.9262	7.05851
	ICT low	a-secretase	26.1612	6.77541	6.83319	0.0596768
	ICT low	a-secretase	26.1821	6.82956
	ICT low	a-secretase	26.4958	6.8946
	ICT mid	a-secretase	23.656	6.43102	6.49236	0.0915227			ΔCт	ΔΔCт	value	SD
	ICT mid	a-secretase	23.9083	6.44849				ctrl	6.96492	6.96492	0.00800481	0.117082
	ICT mid	a-secretase	24.208	6.59756				ICT low	6.83319	6.83319	0.00877013	0.0596768
	ICT high	a-secretase	23.0418	5.77489	5.79105	0.0142226		ICT mid	6.49236	6.49236	0.0111072	0.0915227
	ICT high	a-secretase	23.4243	5.79658				ICT high	5.79105	5.79105	0.0180601	0.0142226
	ICT high	a-secretase	23.4628	5.80168
	Fig. 5Effects of ICT on protein expression of the APP metabolic pathway in APP-PS1-HEK293 cells.
	a-secretase	Ctrl	0.5	5	10
		1.08017	1.29633	1.55615	1.50677
		0.865039	1.12313	1.29315	1.34536
		1.05479	1.22306	1.4751	1.39134
	Aβ1-40	Ctrl	0.5	5	10
		1.00967	0.859485	0.337569	0.294403
		1.05513	0.77711	0.408132	0.404582
		0.935207	0.708475	0.306236	0.258836
	BACE1	Ctrl	0.5	5	10
		1.05577	0.729762	0.615498	0.541783
		0.900793	0.792693	0.518276	0.467355
		1.04343	0.708781	0.582147	0.498191
	PS1	Ctrl	0.5	5	10
		1.10789	0.904469	0.572325	0.380285
		0.881079	0.759756	0.611469	0.458273
		1.01104	0.833712	0.536615	0.342779
	CTF	Ctrl	0.5	5	10
		1.00384	0.87234	0.780733	0.298168
		0.859338	0.760638	0.697695	0.637707
		1.13652	0.704787	0.643617	0.470449
	Aβ1-42	Ctrl	0.5	5	10
		0.986804	0.877052	0.754104	0.600579
		1.02768	0.884776	0.84551	0.460251
		0.985838	0.858384	0.834567	0.539749
	sAPPb	Ctrl	0.5	5	10
		0.730082	0.793876	0.729799	0.581514
		1.4097	0.719308	0.629997	0.218032
		0.860221	0.735186	0.639354	0.60051
	sAPPa	Ctrl	0.5	5	10
		1.10821	1.05011	1.45043	1.72175
		0.99307	1.47761	1.4291	1.43124
		0.898188	1.40192	1.44563	1.58422
